# Supplementary material
Source: Springer Nature journal article supplement (https://www.springermedizin.de/resource/supplementary/12245_2013_172_MOESM1_ESM.pdf/9672926)
Supplement: MOESM1 [file 9672926]

Screened for enrolment 446

Exclusions = 168

No contact method = 3

STEMI = 15

Lacked capacity = 33

Age <30 = 18

Cardiac arrest = 1

Definitive non cardiac cause = 1

Enrolled = 281

Lost to follow-up = 5

Completed 30 day follow-up = 276
